# Supplementary material for: Erbium-Doped GQD-Embedded Coffee-Ground-Derived Porous Biochar for Highly Efficient Asymmetric Supercapacitor
Source: MDPI journal article supplement (doi:10.3390/nano12111939), 2022-06-06
Supplement: s1 [file s1]

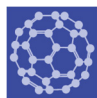

# Erbium-Doped GQD-Embedded Coffee-Ground-Derived Porous Biochar for Highly Efficient Asymmetric Supercapacitor

Thi Ai Ngoc Bui <sup>1</sup>, Trung Viet Huynh <sup>2</sup>, Hai Linh Tran <sup>1</sup> and Ruey-an Doong <sup>2,\*</sup>

<sup>1</sup> Department of Biomedical Engineering and Environmental Sciences, National Tsing Hua University, 101, Sec. 2, Kuang Fu Road, Hsinchu 30013, Taiwan; buiaingoc.ep03g@g2.nctu.edu.tw (T.A.N.B.); tranlinhhai@gmail.com (H.L.T.)

<sup>2</sup> Institute of Analytical and Environmental Sciences, National Tsing Hua University, 101, Sec. 2, Kuang Fu Road, Hsinchu 30013, Taiwan; htviet1993@gmail.com

\* Correspondence: radoong@mx.nthu.edu.tw

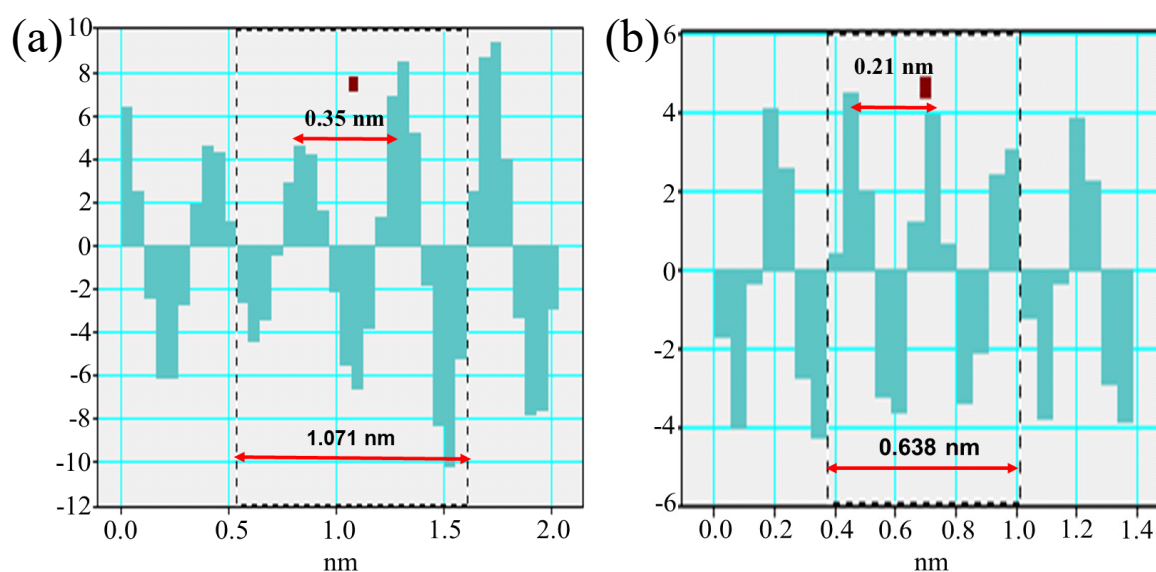

Figure S1. Lattice spacings of (a) pure HPB and (b) Er 10-GQD/HPB.

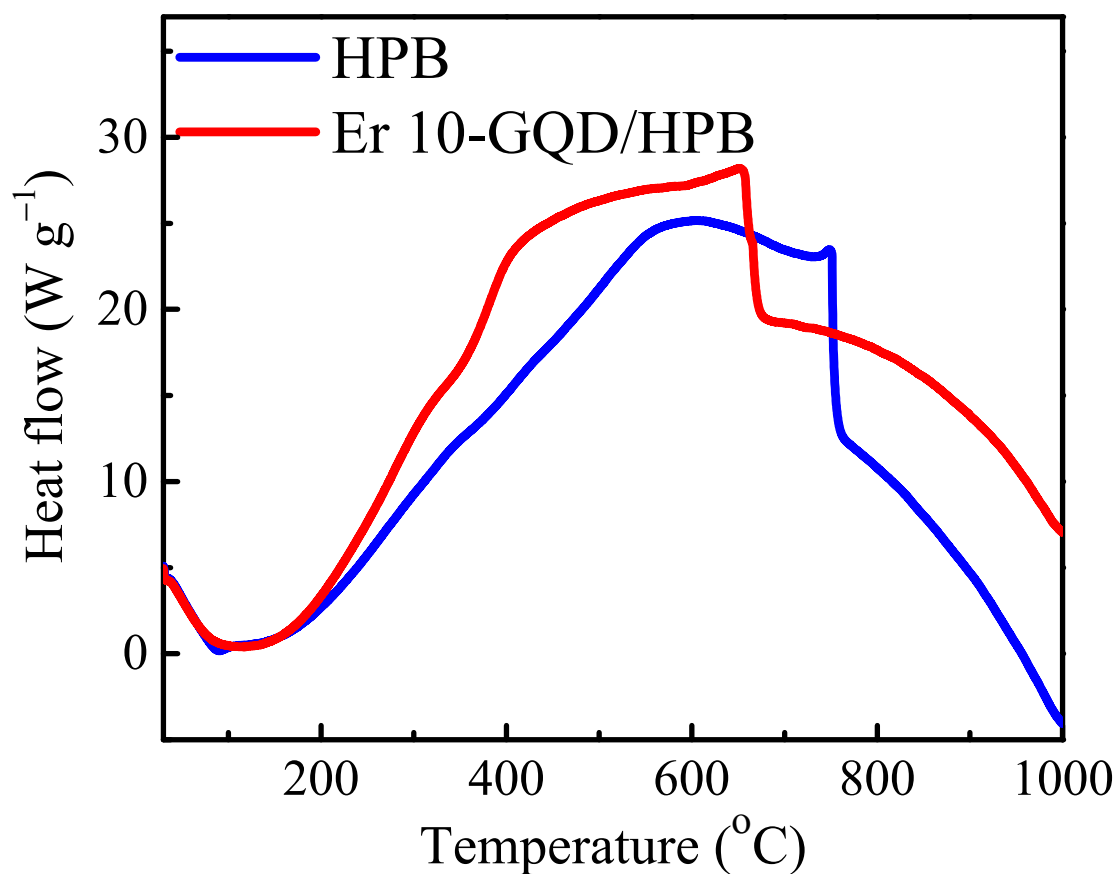

**Figure S2.** The differential scanning calorimetry (DSC) of HPB and Er 10-GQD/HPB.

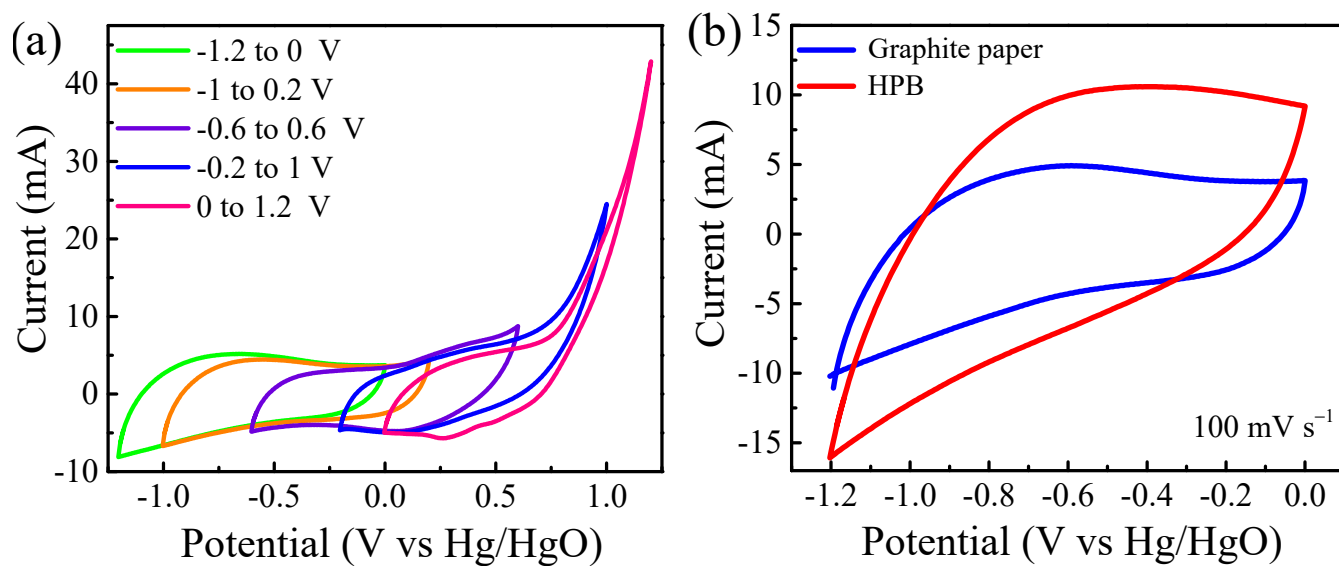

**Figure S3.** CV curves of (a) graphite paper and (b) HPB and graphite paper at 100 mV s<sup>-1</sup> in different voltage windows of -1.2–1.0 V.

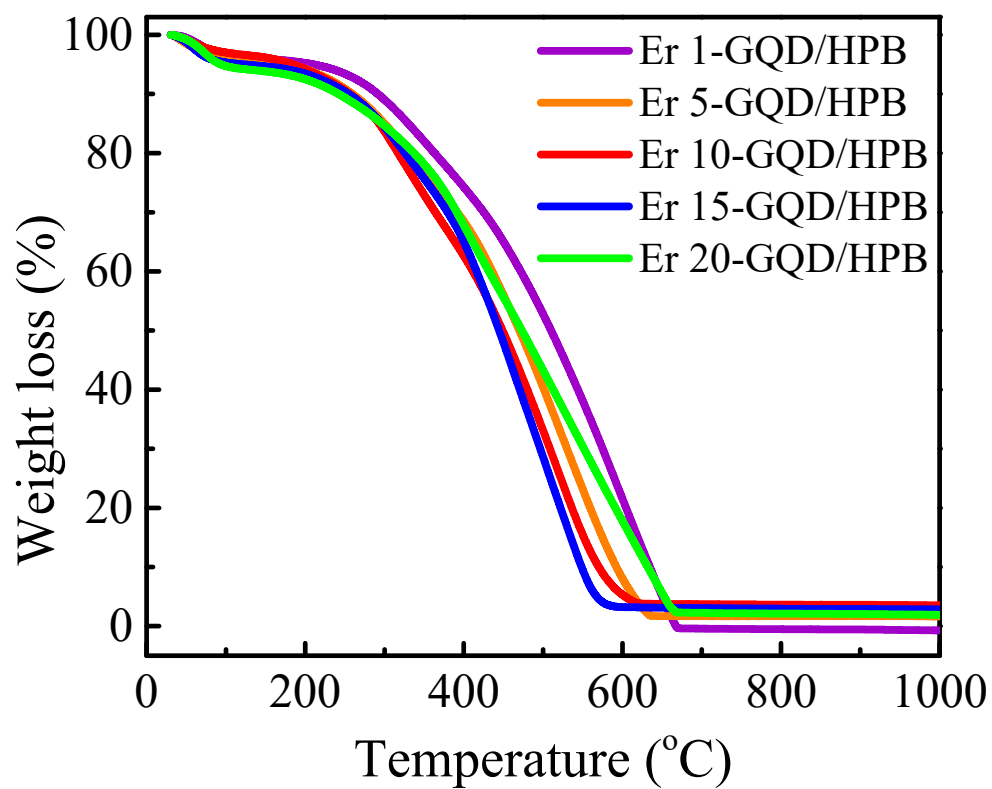

**Figure S4.** TGA curves of Er-GQD/HPB nanocomposite in various Er loading from 1 to 20 mM.

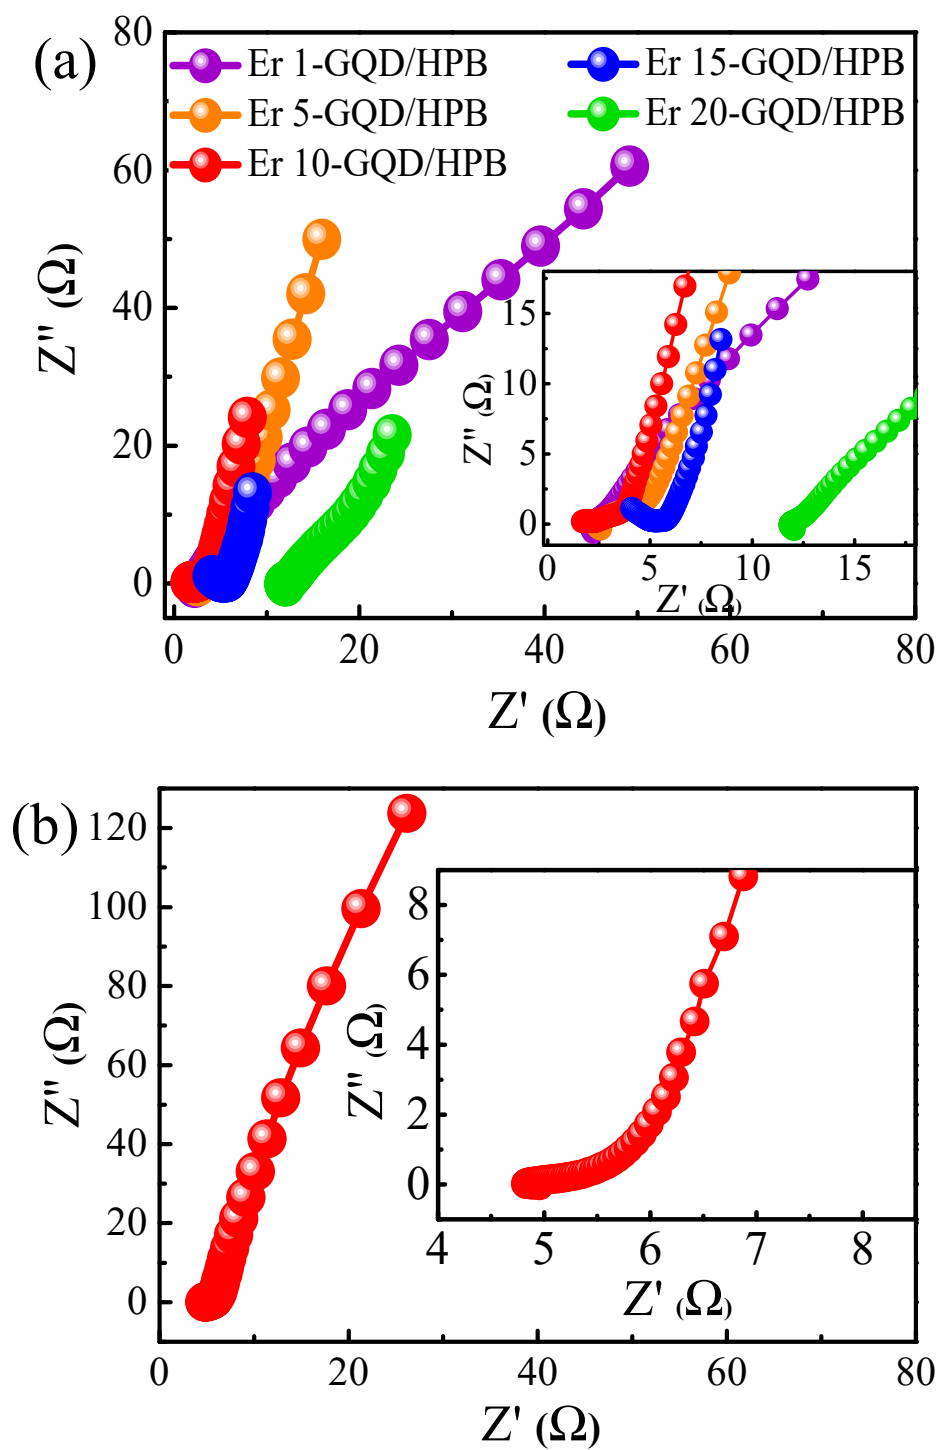

**Figure S5.** Nyquist plots of (a) Er-GQD/HPB at different Er loadings of 1–20 mM and (b) pure HPB.

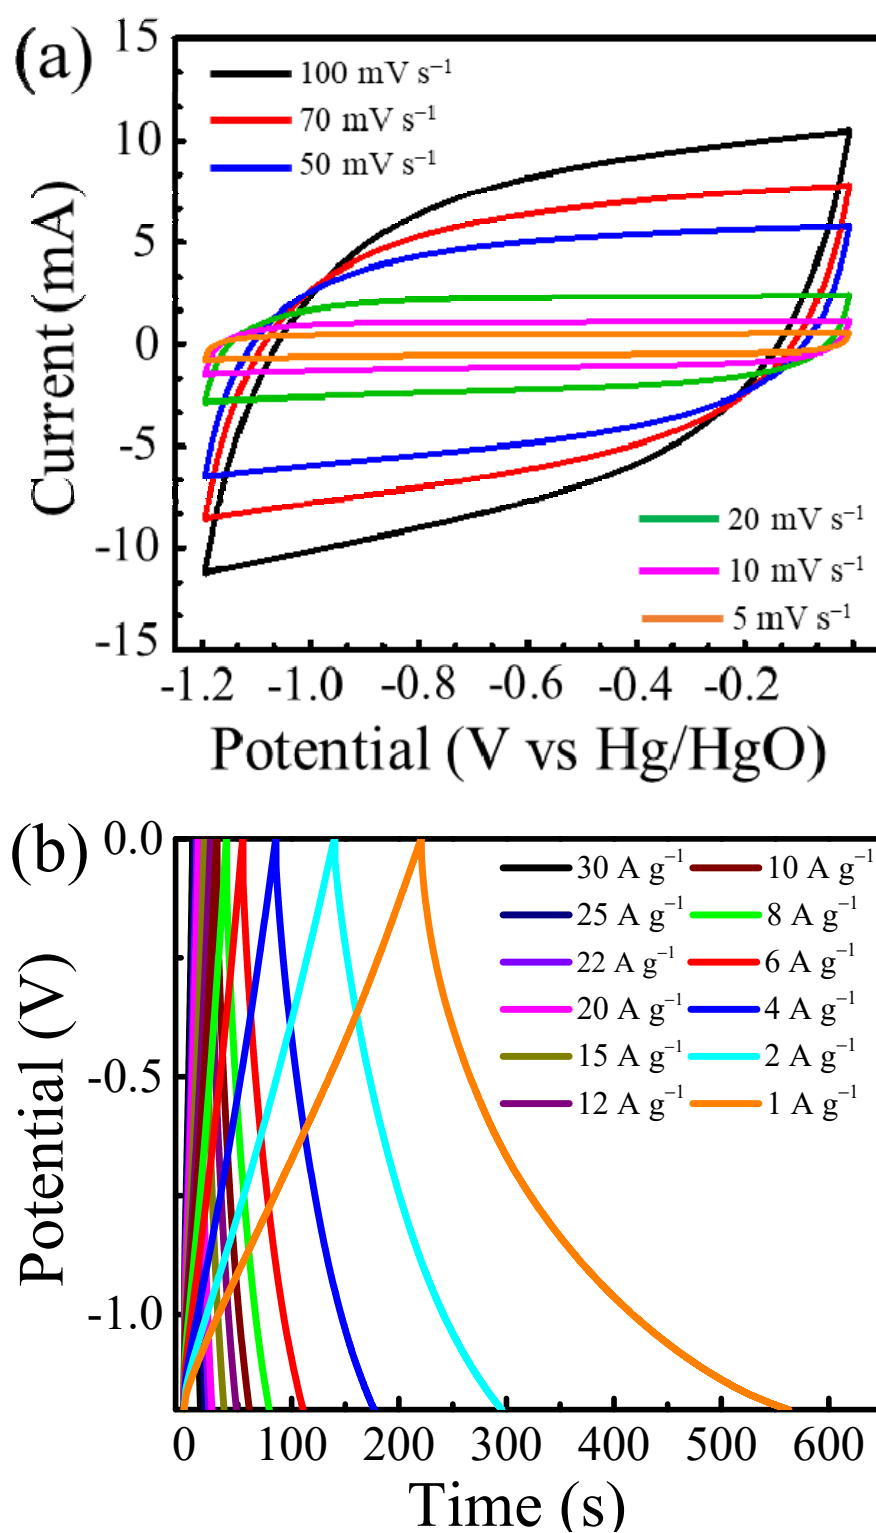

**Figure S6.** (a) CV curves and (b) GCD of pure HPB.

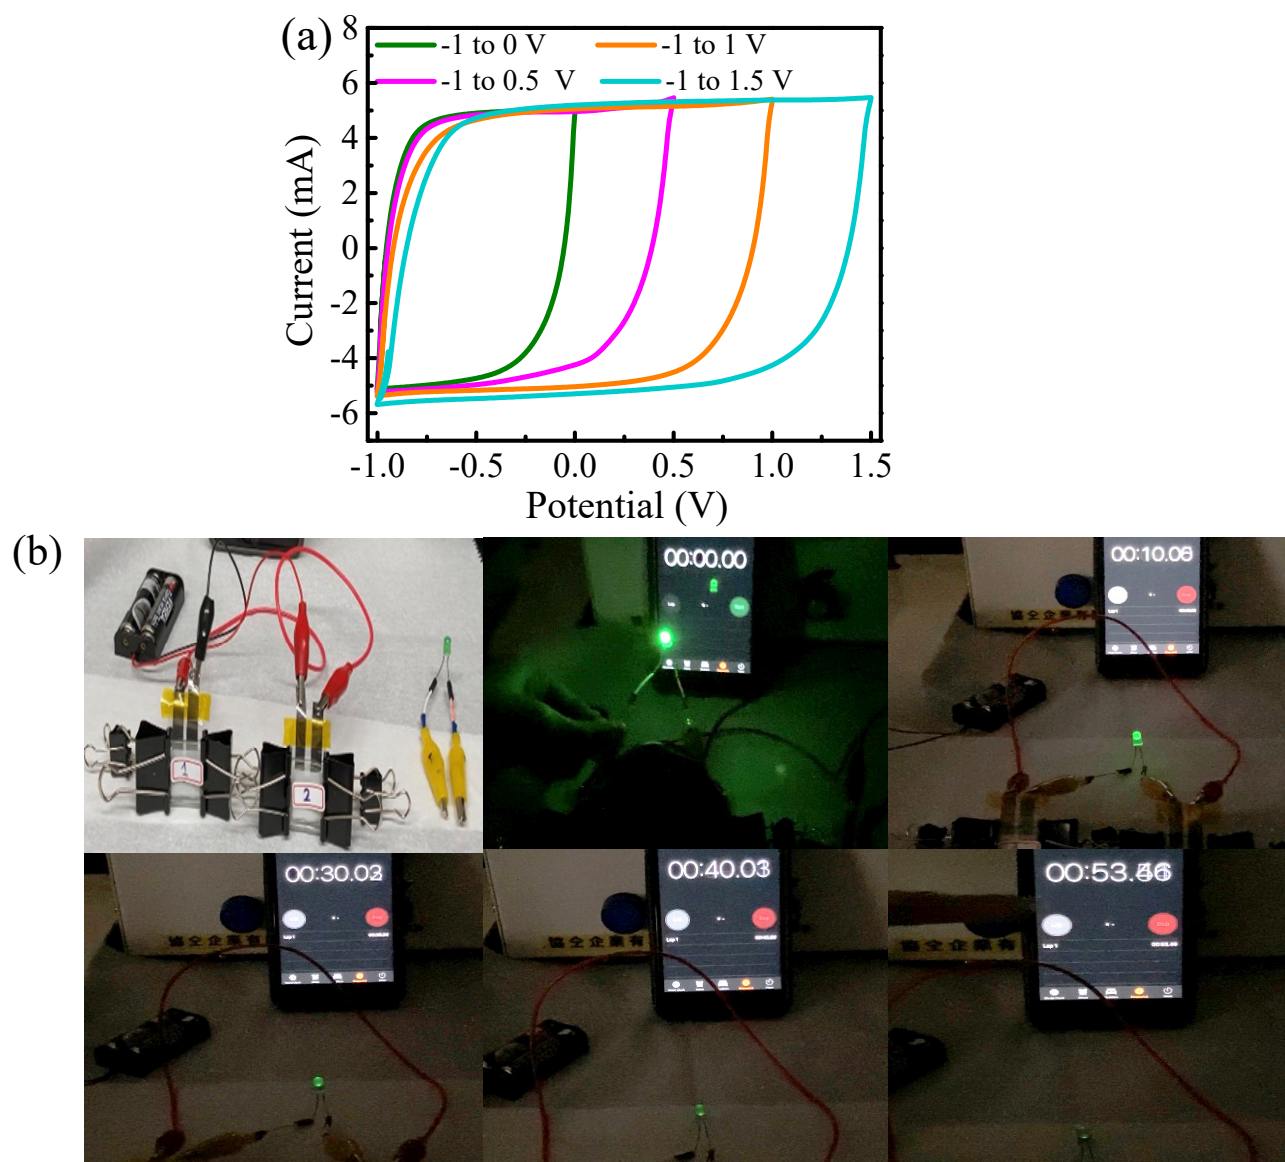

**Figure S7.** (a) CV curves of Er 10-GQD/HPB||HPB in different voltage windows at  $100 \text{ mV s}^{-1}$  and (b) demonstration of lighting of LED powered by Er 10-GQD/HPB||HPB.
